# Supplementary material
Source: publisher site journal article supplement (https://www.dovepress.com/article/578559)
Supplement: Supplementary file 1 [file Supplementary%20Files-11.1.docx]

**Table S1** Changes in the content of each component in different compatibility solutions over time (%, n=3)

| Mixture | Component | T0 concentration (μg·mL-1) | 0h | 2h | 4h | 6h | 8h | 12h | 24h |
| --- | --- | --- | --- | --- | --- | --- | --- | --- | --- |
| M1 | Butorphanol | 20.02 | 100 | 100.49 | 100.55 | 100.82 | 101.96 | 100.47 | 100.89 |
| Nicardipine | 78.33 | 100 | 99.79 | 100.12 | 100.95 | 100.14 | 99.87 | 100.16 |
| Urapidil | 176.23 | 100 | 100.46 | 100.9 | 100.95 | 101.22 | 100.46 | 98.26 |
| Tirofiban | 11.27 | 100 | 99.87 | 100.08 | 100.57 | 100.77 | 99.45 | 100.6 |
| M2 | Butorphanol | 30.69 | 100 | 100.83 | 100.58 | 100.91 | 101.09 | 104.04 | 101.21 |
| Nicardipine | 140.65 | 100 | 101.59 | 101.32 | 100.51 | 101.43 | 102.66 | 101.43 |
| Urapidil | 272.88 | 100 | 101.59 | 101.57 | 101.82 | 102.17 | 104.73 | 101.41 |
| M3 | Butorphanol | 24.97 | 100 | 100.39 | 99.77 | 99.89 | 100.41 | 99.76 | 101.25 |
| Nicardipine | 115.87 | 100 | 99.68 | 96.84 | 99.15 | 99.64 | 100.4 | 99.22 |
| Tirofiban | 14.24 | 100 | 99.71 | 98.75 | 99.52 | 100.24 | 100.55 | 100.67 |
| M4 | Butorphanol | 30.54 | 100 | 98.43 | 96.91 | 96.61 | 96.29 | 99.44 | 96.22 |
| Urapidil | 287.59 | 100 | 99.79 | 98.2 | 97.84 | 97.59 | 101.16 | 97.7 |
| Tirofiban | 18.32 | 100 | 95.37 | 94.04 | 99.49 | 96.52 | 98.87 | 95.97 |
| M5 | Nicardipine | 137.24 | 100 | 98.99 | 97.43 | 97.41 | 94.55 | 94.5 | 74.35 |
| Urapidil | 293.39 | 100 | 100.84 | 101.52 | 101.94 | 102.36 | 102.57 | 101.33 |
| Tirofiban | 18.48 | 100 | 101.36 | 102.96 | 101.88 | 103.67 | 102.46 | 100.5 |
| M6 | Butorphanol | 37.85 | 100 | 98.98 | 99.92 | 99.91 | 101.18 | 99.91 | 99.00 |
| Nicardipine | 183.41 | 100 | 99.23 | 100.48 | 99.51 | 100.85 | 96.73 | 98.30 |
| M7 | Butorphanol | 54.27 | 100 | 102.71 | 101.60 | 102.61 | 102.79 | 103.26 | 101.84 |
| Urapidil | 549.69 | 100 | 92.15 | 90.96 | 91.46 | 91.56 | 92.70 | 91.93 |
| M8 | Butorphanol | 32.90 | 100 | 99.88 | 99.11 | 99.31 | 98.75 | 99.31 | 98.75 |
| Tirofiban | 18.70 | 100 | 100.75 | 101.84 | 99.98 | 100.22 | 98.91 | 99.16 |
| M9 | Nicardipine | 250.33 | 100 | 99.80 | 101.57 | 97.23 | 98.08 | 98.91 | 99.69 |
| Urapidil | 509.09 | 100 | 101.31 | 101.33 | 99.84 | 100.10 | 98.53 | 97.74 |
| M10 | Nicardipine | 146.97 | 100 | 97.74 | 95.41 | 97.88 | 100.06 | 76.29 | 71.46 |
| Tirofiban | 18.17 | 100 | 98.58 | 98.95 | 98.57 | 99.93 | 101.20 | 98.83 |
| M11 | Urapidil | 485.01 | 100 | 94.25 | 95.74 | 96.57 | 96.65 | 97.19 | 94.23 |
| Tirofiban | 26.90 | 100 | 97.51 | 101.09 | 100.48 | 96.78 | 100.29 | 99.54 |
